# Supplementary material for: Acute respiratory distress syndrome
Source: Springer Nature journal article supplement (doi:10.1038/s41572-019-0069-0), 2019-03-14
Supplement: 41572_2019_69_MOESM1_ESM.pdf [file 41572_2019_69_MOESM1_ESM.pdf]

# Acute respiratory distress syndrome

---

*Michael A. Matthay, Rachel L. Zemans, Guy A. Zimmerman, Yaseen M. Arabi, Jeremy R. Beitler, Alain Mercat, Margaret Herridge, Adrienne G. Randolph and Carolyn S. Calfee*

<https://doi.org/10.1038/s41572-019-0069-0>



## Common respiratory pathogens in ARDS and associated demographic features and co-morbidities.<sup>1-49</sup> Common community-acquired and hospital-acquired pneumonia pathogens should always be considered.

<sup>a</sup> Pneumonic plague: Most human cases have occurred in Africa, but cases have also been reported in Asia and South America. The three most endemic countries are the Democratic Republic of Congo, Madagascar (where the most recent outbreak occurred in 2017) and Peru.

<sup>b</sup> Avian Influenza H5N1: Cases reported from 16 countries, but mainly Bangladesh, China, Egypt, India, Indonesia and Vietnam.<sup>27</sup> 860 cases of Avian Influenza H5N1 and 454 deaths since 2003 from 16 countries. None in 2018 as of as of 28 May 2018<sup>28</sup>

<sup>c</sup> Avian Influenza H7N9: Cases are reported from China.<sup>29,30</sup>

<sup>d</sup> SARS: Severe acute respiratory syndrome (SARS) coronavirus was first manifested in humans in China in November 2002, but no cases have been reported since 2004.<sup>34,35</sup>

<sup>e</sup> Middle East Respiratory Syndrome coronavirus (MERS-CoV): Cases have been reported from 27 countries, although >80% were from Saudi Arabia. Cases identified outside the Arabian Peninsula were linked to travel to the Arabian Peninsula or to contact with someone returning from the Arabian Peninsula.<sup>37</sup>

<sup>a</sup> Hantavirus: In the United States, cases have been reported from 36 states, the majority have been from southwest states. Cases also reported in several countries in South America, As of January 2017, a total of 728 cases of Hantavirus Infection have been reported in the United States.<sup>26</sup>

## References

1. Polverino, E., *et al.* Microbiology and outcomes of community acquired pneumonia in non cystic-fibrosis bronchiectasis patients. *J Infect* **71**, 28-36 (2015).
2. Cilloniz, C., *et al.* Acute respiratory distress syndrome in mechanically ventilated patients with community-acquired pneumonia. *Eur Respir J* **51**(2018).
3. Reynaldos Canton Migotto, T., Gyorik Lora, S., Gaia, V. & Pagnamenta, A. ARDS with septic shock due to Legionella longbeachae pneumonia in a patient with polymyalgia rheumatica. *Heart Lung Vessel* **6**, 114-118 (2014).
4. Bodur, H., *et al.* Legionella pneumonia with acute respiratory distress syndrome, myocarditis and septic shock successfully treated with Drotrecogin Alpha (activated). *Eur J Anaesthesiol* **23**, 808-810 (2006).
5. Demello, D., Kierol-Andrews, L. & Scalise, P.J. Severe sepsis and acute respiratory distress syndrome from community-acquired legionella pneumonia: case report. *Am J Crit Care* **16**, 320, 317 (2007).
6. Nozue, T., *et al.* Legionella pneumonia associated with adult respiratory distress syndrome caused by Legionella pneumophila serogroup 3. *Intern Med* **44**, 73-78 (2005).
7. Balis, E., Boufas, A., Iliopoulos, I., Legakis, N.J. & Zerva, L. Severe community-acquired pneumonia with acute hypoxemic respiratory failure due to primary infection with Chlamydia pneumoniae in a previously healthy adult. *Clin Infect Dis* **36**, e155-157 (2003).
8. Marik, P.E. & Iglesias, J. Severe community-acquired pneumonia, shock and multiorgan dysfunction syndrome caused by Chlamydia pneumoniae. *J Intern Med* **241**, 441-444 (1997).
9. Panagou, P., Tsipra, S. & Bouros, D. Adult respiratory distress syndrome due to Chlamydia pneumoniae in a young adult. *Respir Med* **90**, 311-313 (1996).
10. Mofredj, A., Guerin, J.M. & Leibinger, F. Chlamydia pneumoniae may cause respiratory distress syndrome. *Respiration* **65**, 227 (1998).
11. Radisic, M., Torn, A., Gutierrez, P., Defranchi, H.A. & Pardo, P. Severe acute lung injury caused by Mycoplasma pneumoniae: potential role for steroid pulses in treatment. *Clin Infect Dis* **31**, 1507-1511 (2000).
12. Chaabane, N., Coupez, E., Buscot, M. & Souweine, B. Acute respiratory distress syndrome related to Mycoplasma pneumoniae infection. *Respir Med Case Rep* **20**, 89-91 (2017).
13. Kao, K.C., *et al.* Coinfection and Mortality in Pneumonia-Related Acute Respiratory Distress Syndrome Patients with Bronchoalveolar Lavage: A Prospective Observational Study. *Shock* **47**, 615-620 (2017).
14. Hasvold, J., Sjoding, M., Pohl, K., Cooke, C. & Hyzy, R.C. The role of human metapneumovirus in the critically ill adult patient. *J Crit Care* **31**, 233-237 (2016).
15. Muscedere, J., *et al.* Subglottic secretion drainage for the prevention of ventilator-associated pneumonia: a systematic review and meta-analysis. *Crit Care Med* **39**, 1985-1991 (2011).
16. Joshi, P.C. & Guidot, D.M. The alcoholic lung: epidemiology, pathophysiology, and potential therapies. *Am J Physiol Lung Cell Mol Physiol* **292**, L813-823 (2007).

17. Reissig, A., *et al.* Microbiological diagnosis and antibiotic therapy in patients with community-acquired pneumonia and acute COPD exacerbation in daily clinical practice: comparison to current guidelines. *Lung* **191**, 239-246 (2013).
18. Li, X.J., Li, Q., Si, L.Y. & Yuan, Q.Y. Bacteriological differences between COPD exacerbation and community-acquired pneumonia. *Respir Care* **56**, 1818-1824 (2011).
19. Boschini, A., *et al.* Community-acquired pneumonia in a cohort of former injection drug users with and without human immunodeficiency virus infection: incidence, etiologies, and clinical aspects. *Clin Infect Dis* **23**, 107-113 (1996).
20. Cordero, E., *et al.* Community-acquired bacterial pneumonia in human immunodeficiency virus-infected patients: validation of severity criteria. The Grupo Andaluz para el Estudio de las Enfermedades Infecciosas. *Am J Respir Crit Care Med* **162**, 2063-2068 (2000).
21. Mirouse, A., *et al.* Severe varicella-zoster virus pneumonia: a multicenter cohort study. *Crit Care* **21**, 137 (2017).
22. Robert, D., *et al.* A series of five adult cases of respiratory syncytial virus-related acute respiratory distress syndrome. *Anaesth Intensive Care* **36**, 230-234 (2008).
23. Luo, Y.H., Huang, C.Y., Yang, K.Y. & Lee, Y.C. Inhaled ribavirin therapy in adult respiratory syncytial virus-induced acute respiratory distress syndrome. *Arch Bronconeumol* **47**, 315-317 (2011).
24. Schwartz, I.S., Embil, J.M., Sharma, A., Goulet, S. & Light, R.B. Management and Outcomes of Acute Respiratory Distress Syndrome Caused by Blastomycosis: A Retrospective Case Series. *Medicine (Baltimore)* **95**, e3538 (2016).
25. Centers for Disease Control and Prevention. Blastomycosis. <https://www.cdc.gov/fungal/diseases/blastomycosis/index.html>. Last visited January 23-2019.
26. Centers for Disease Control and Prevention. Reported Cases of Hantavirus Disease. <https://www.cdc.gov/hantavirus/surveillance/index.html>. Accessed on January 23-2019.
27. Centers for Disease Control and Prevention. Highly Pathogenic Asian Avian Influenza A (H5N1) in People. <https://www.cdc.gov/flu/avianflu/h5n1-people.htm>. Last visited Jan 23-2019.
28. The World Health Organization. Cumulative number of confirmed human cases of avian influenza A(H5N1) reported to WHO. [https://www.who.int/influenza/human\\_animal\\_interface/H5N1\\_cumulative\\_table\\_archives/en/](https://www.who.int/influenza/human_animal_interface/H5N1_cumulative_table_archives/en/) Accessed January 23, 2019.
29. Tang, X., *et al.* ARDS associated with pneumonia caused by avian influenza A H7N9 virus treated with extracorporeal membrane oxygenation. *Clin Respir J* **9**, 380-384 (2015).
30. Centers for Disease Control and Prevention. Asian Lineage Avian Influenza A (H7N9) Virus. <https://www.cdc.gov/flu/avianflu/h7n9-virus.htm>. Last visited January 23-2019.
31. Zhang, S.Y., *et al.* Fatal pneumonia cases caused by human adenovirus 55 in immunocompetent adults. *Infect Dis (Lond)* **48**, 40-47 (2016).
32. Tan, D., *et al.* Severe Community-Acquired Pneumonia Caused by Human Adenovirus in Immunocompetent Adults: A Multicenter Case Series. *PLoS One* **11**, e0151199 (2016).
33. Sun, B., *et al.* Emergent severe acute respiratory distress syndrome caused by adenovirus type 55 in immunocompetent adults in 2013: a prospective observational study. *Crit Care* **18**, 456 (2014).
34. Peiris, J.S., *et al.* Clinical progression and viral load in a community outbreak of coronavirus-associated SARS pneumonia: a prospective study. *Lancet* **361**, 1767-1772 (2003).
35. Booth, C.M., *et al.* Clinical features and short-term outcomes of 144 patients with SARS in the greater Toronto area. *JAMA* **289**, 2801-2809 (2003).
36. Arabi, Y.M., *et al.* Critically Ill Patients With the Middle East Respiratory Syndrome: A Multicenter Retrospective Cohort Study. *Crit Care Med* **45**, 1683-1695 (2017).
37. Arabi, Y.M., *et al.* Middle East Respiratory Syndrome. *N Engl J Med* **376**, 584-594 (2017).
38. Losert, H., *et al.* Experiences with severe *P. falciparum* malaria in the intensive care unit. *Intensive Care Med* **26**, 195-201 (2000).
39. Antinori, S., *et al.* Severe *Plasmodium falciparum* malaria in the intensive care unit: A 6-year experience in Milano, Italy. *Travel Med Infect Dis* **17**, 43-49 (2017).
40. Gachot, B., Wolff, M., Nissack, G., Veber, B. & Vachon, F. Acute lung injury complicating imported *Plasmodium falciparum* malaria. *Chest* **108**, 746-749 (1995).
41. The World Health Organization. Plague - Madagascar. <http://www.who.int/ith/updates/20171003/en/>. Accessed January 23-2019.
42. Muthu, V., *et al.* Acute Respiratory Distress Syndrome Due To Tuberculosis in a Respiratory ICU Over a 16-Year Period. *Crit Care Med* **45**, e1087-e1090 (2017).
43. Deng, W., *et al.* Predictors and outcome of patients with acute respiratory distress syndrome caused by miliary tuberculosis: a retrospective study in Chongqing, China. *BMC Infect Dis* **12**, 121 (2012).

44. Penner, C., Roberts, D., Kunimoto, D., Manfreda, J. & Long, R. Tuberculosis as a primary cause of respiratory failure requiring mechanical ventilation. *Am J Respir Crit Care Med* **151**, 867-872 (1995).
45. Agarwal, R., Gupta, D., Aggarwal, A.N., Behera, D. & Jindal, S.K. Experience with ARDS caused by tuberculosis in a respiratory intensive care unit. *Intensive Care Med* **31**, 1284-1287 (2005).
46. Mohan, A., Sharma, S.K. & Pande, J.N. Acute respiratory distress syndrome (ARDS) in miliary tuberculosis: a twelve year experience. *Indian J Chest Dis Allied Sci* **38**, 157-162 (1996).
47. Oddo, M., Jolidon, R.M., Peter, O., Poli, S. & Cometta, A. Q fever pneumonia complicated by acute respiratory distress syndrome. *Intensive Care Med* **27**, 615 (2001).
48. Ricketts, K.D., Yadav, R., Rota, M.C., Joseph, C.A. & European Working Group for Legionella, I. Characteristics of reoffending accommodation sites in Europe with clusters of Legionnaires disease, 2003-2007. *Euro Surveill* **15**(2010).
49. Rafat, C., *et al.* Severe Measles Infection: The Spectrum of Disease in 36 Critically Ill Adult Patients. *Medicine (Baltimore)* **92**, 257-272 (2013).
